# Supplementary material
Source: HighWire-hosted journal article supplement (doi:10.1101/rna.072660.119)
Supplement: Supplemental_Figures_Tables.docx [file Supplemental_Figures_Tables.docx]

**RNA-article**

Supplementary Information

**Adenine·cytosine substitutions are an alternative pathway of compensatory mutation** **in angiosperm ITS2**

**XINWAN ZHANG1,3, YONG CAO1,3, WEI ZHANG1,2, MARK P. SIMMONS2**

1*Marine College, Shandong University, Weihai 264209, China*

2*Department of Biology, Colorado State University, Fort Collins 80523, USA*

*3These authors contributed equally to this work*

*Corresponding author:* [*wzhang@sdu.edu.cn*](mailto:wzhang@sdu.edu.cn)


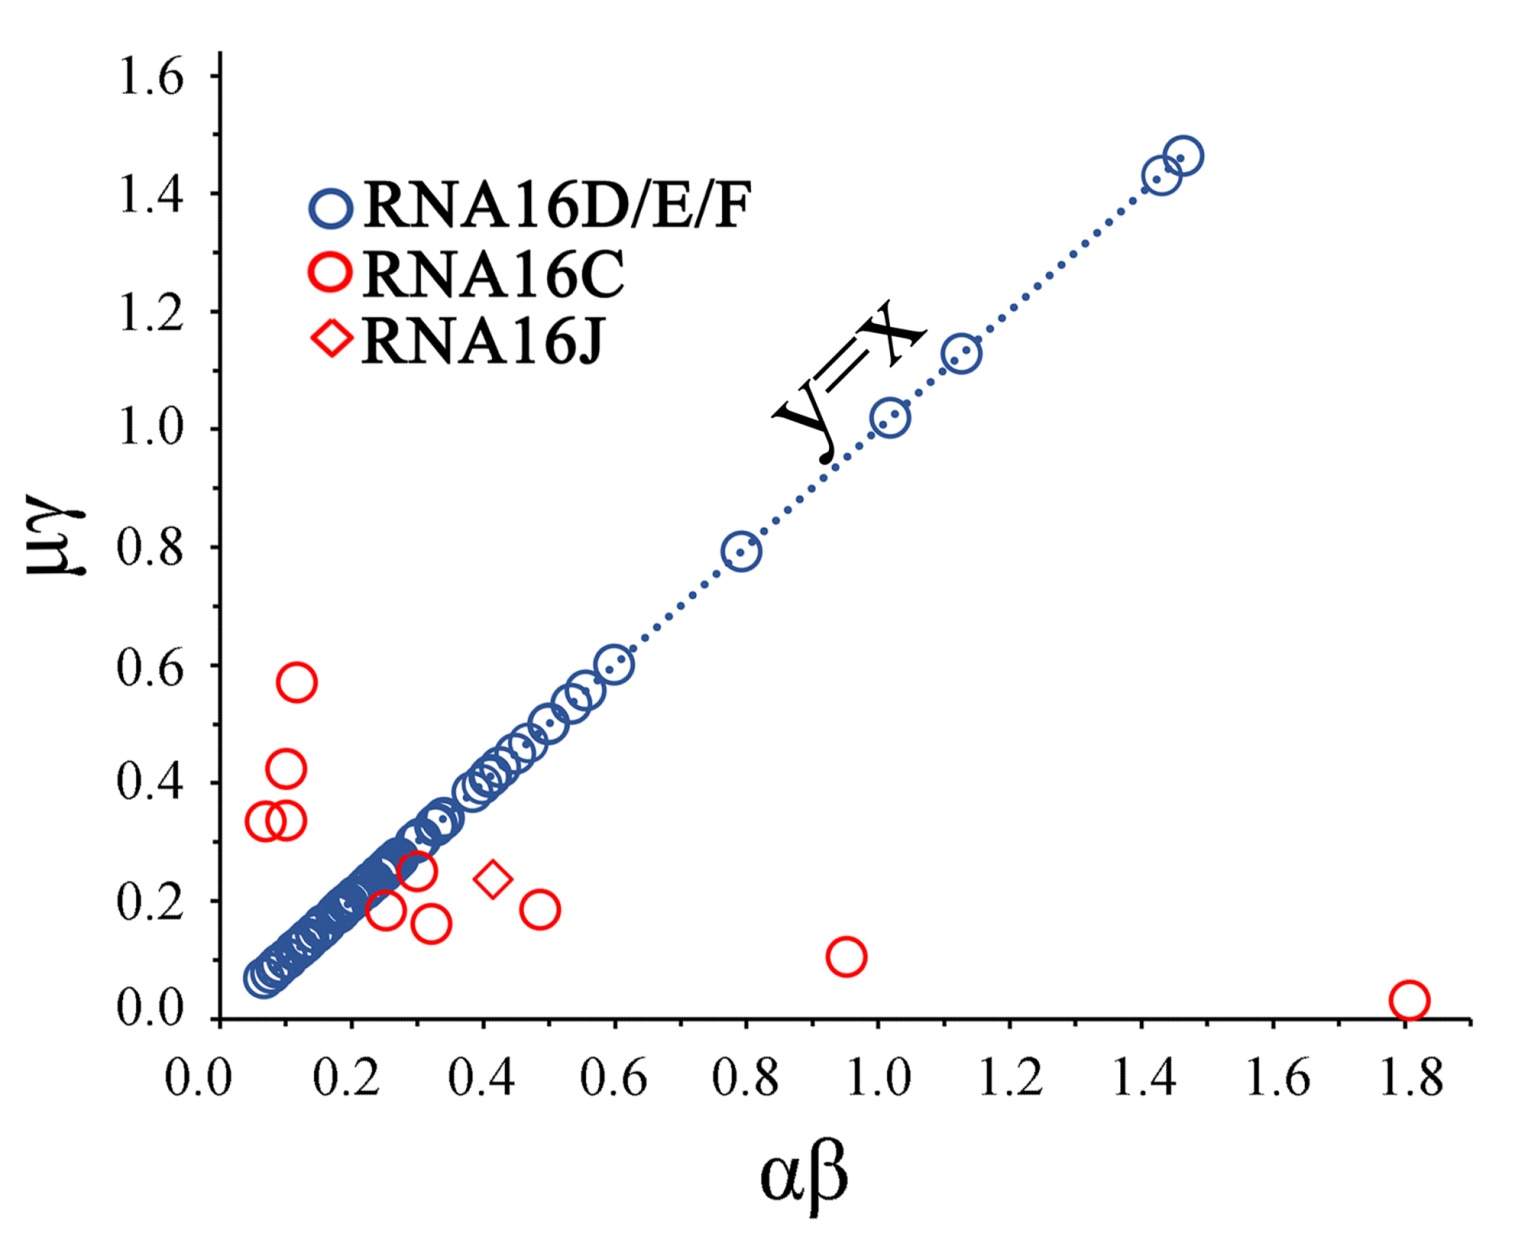


**FIGURE S1** Substitution rates inferred from the RNA16D/E/F model, which is subject to the equation α*β=μ*γ, which accounts for the y=x line of blue points. The results are shown based on AU→GC compensatory substitutions.


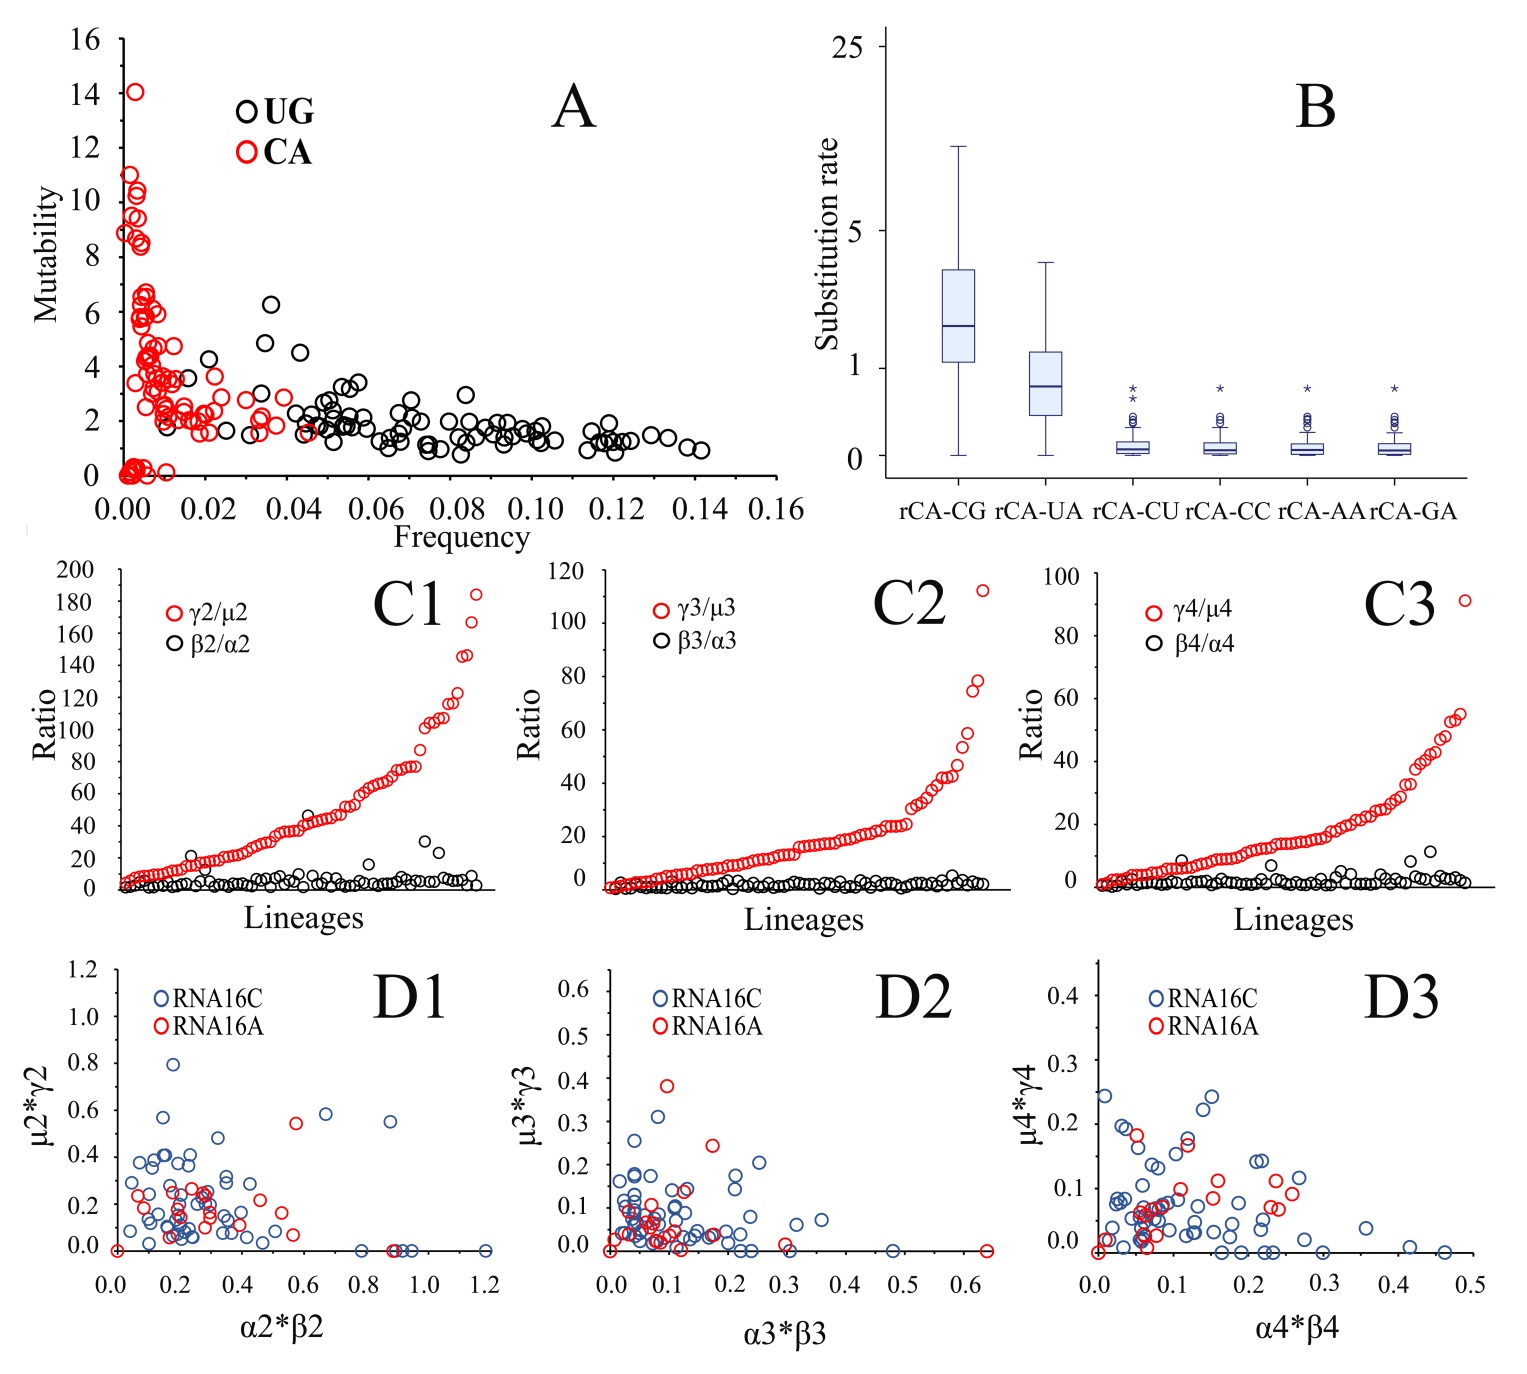


**FIGURE S2.** Complement comparisons of substitution rates and base-pair frequencies between AC (CA) and GU (UG) intermediate base pairs for three alternative CBCs. Subscript numbers 2-4 represent UA→CG, GC→AU and CG→UA, respectively (Fig. 1, Table 1). All results are shown based on the best-fit double-substitution rate matrix for each of the 80 sampled lineages. *(A)* Frequency-mutability scatter plot of CA and UG pairs. *(B)* Box-plots for single-substitution rates from CA to six other base-pairs. *(C)* Comparisons of rate heterogeneity between AC- and GU-mediated CBCs. The two substitution-rate ratios for AC(CA)-mediated CBCs are generally higher than those for GU(UG)-mediated CBCs. *(D)* Comparisons of the total probabilities of change from AU (UA) to GC (CG) based on multiplying the pairs of single-substitution rates. αn*βn and μn*γn represent the probability of GU(UG)- and AC(CA)-mediated CBCs, respectively (Fig. 1).


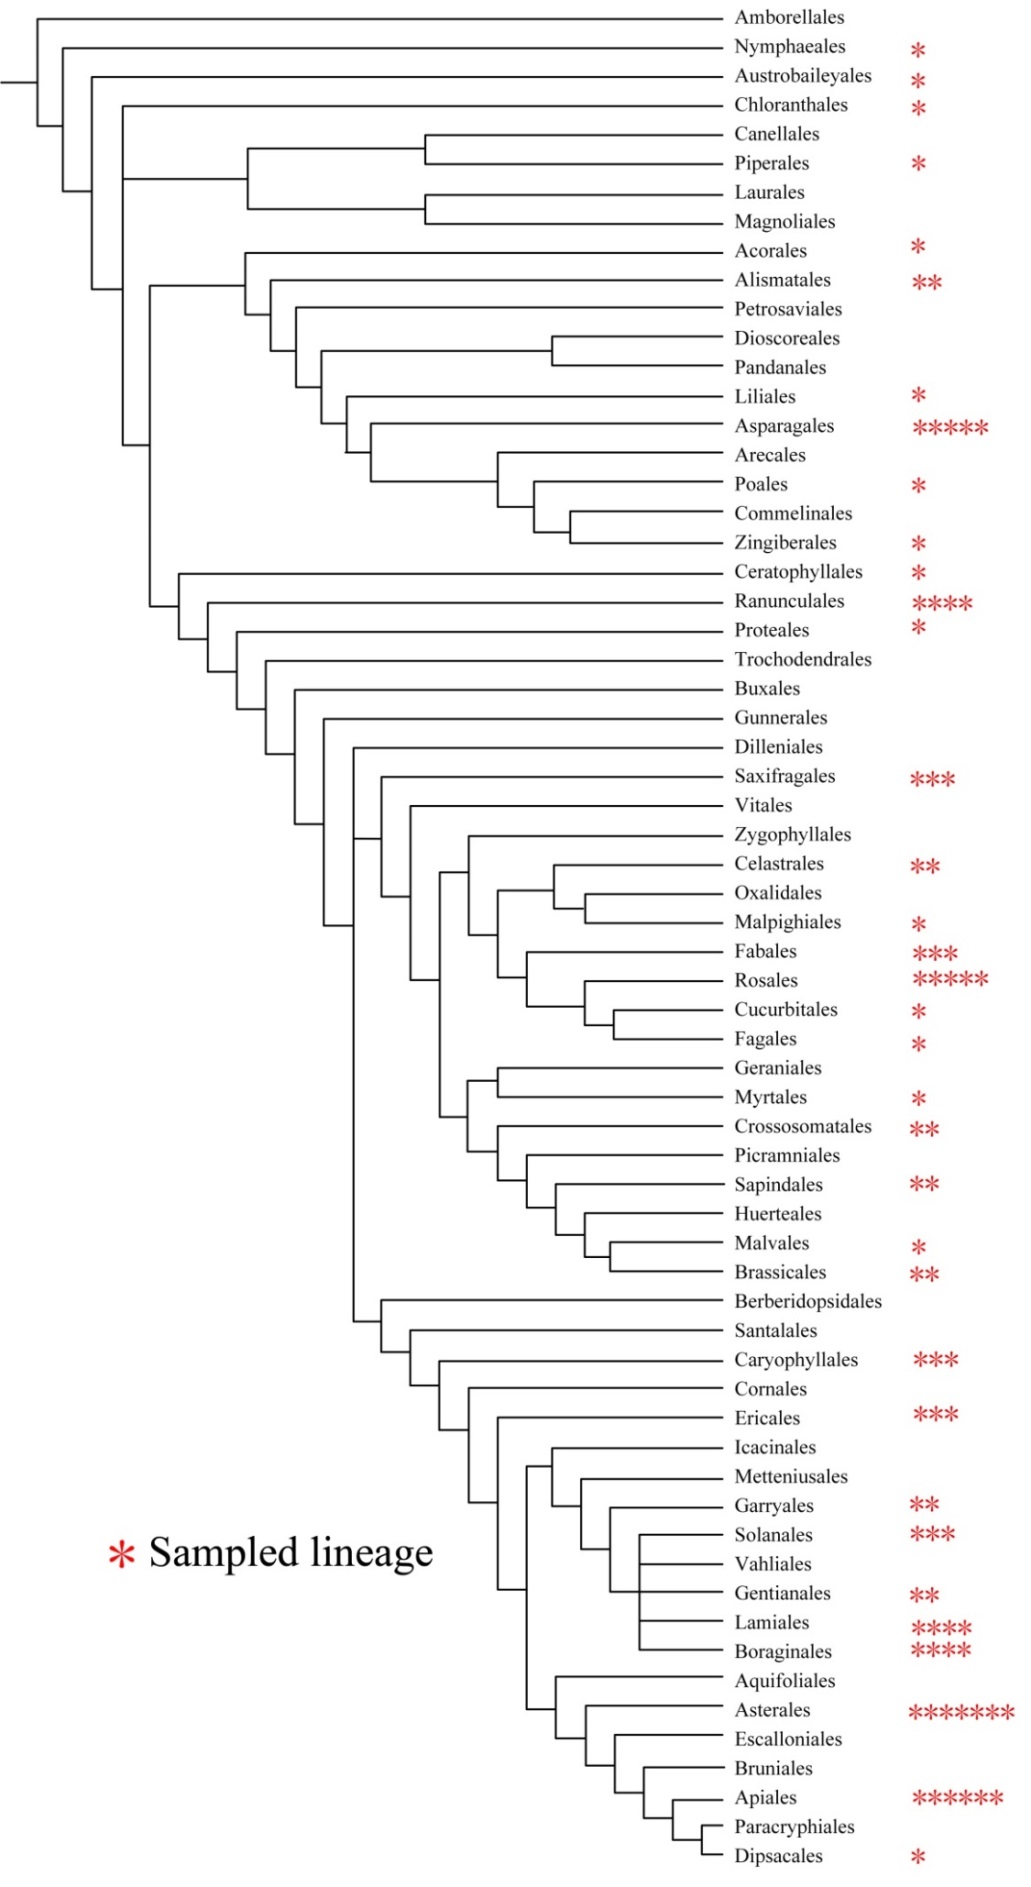


**FIGURE S3.** Phylogenetic relationships among the 80 sampled lineages based on The Angiosperm Phylogeny Group (APG; Chase et al., 2016) classification and their figure-1 phylogenetic tree.

**
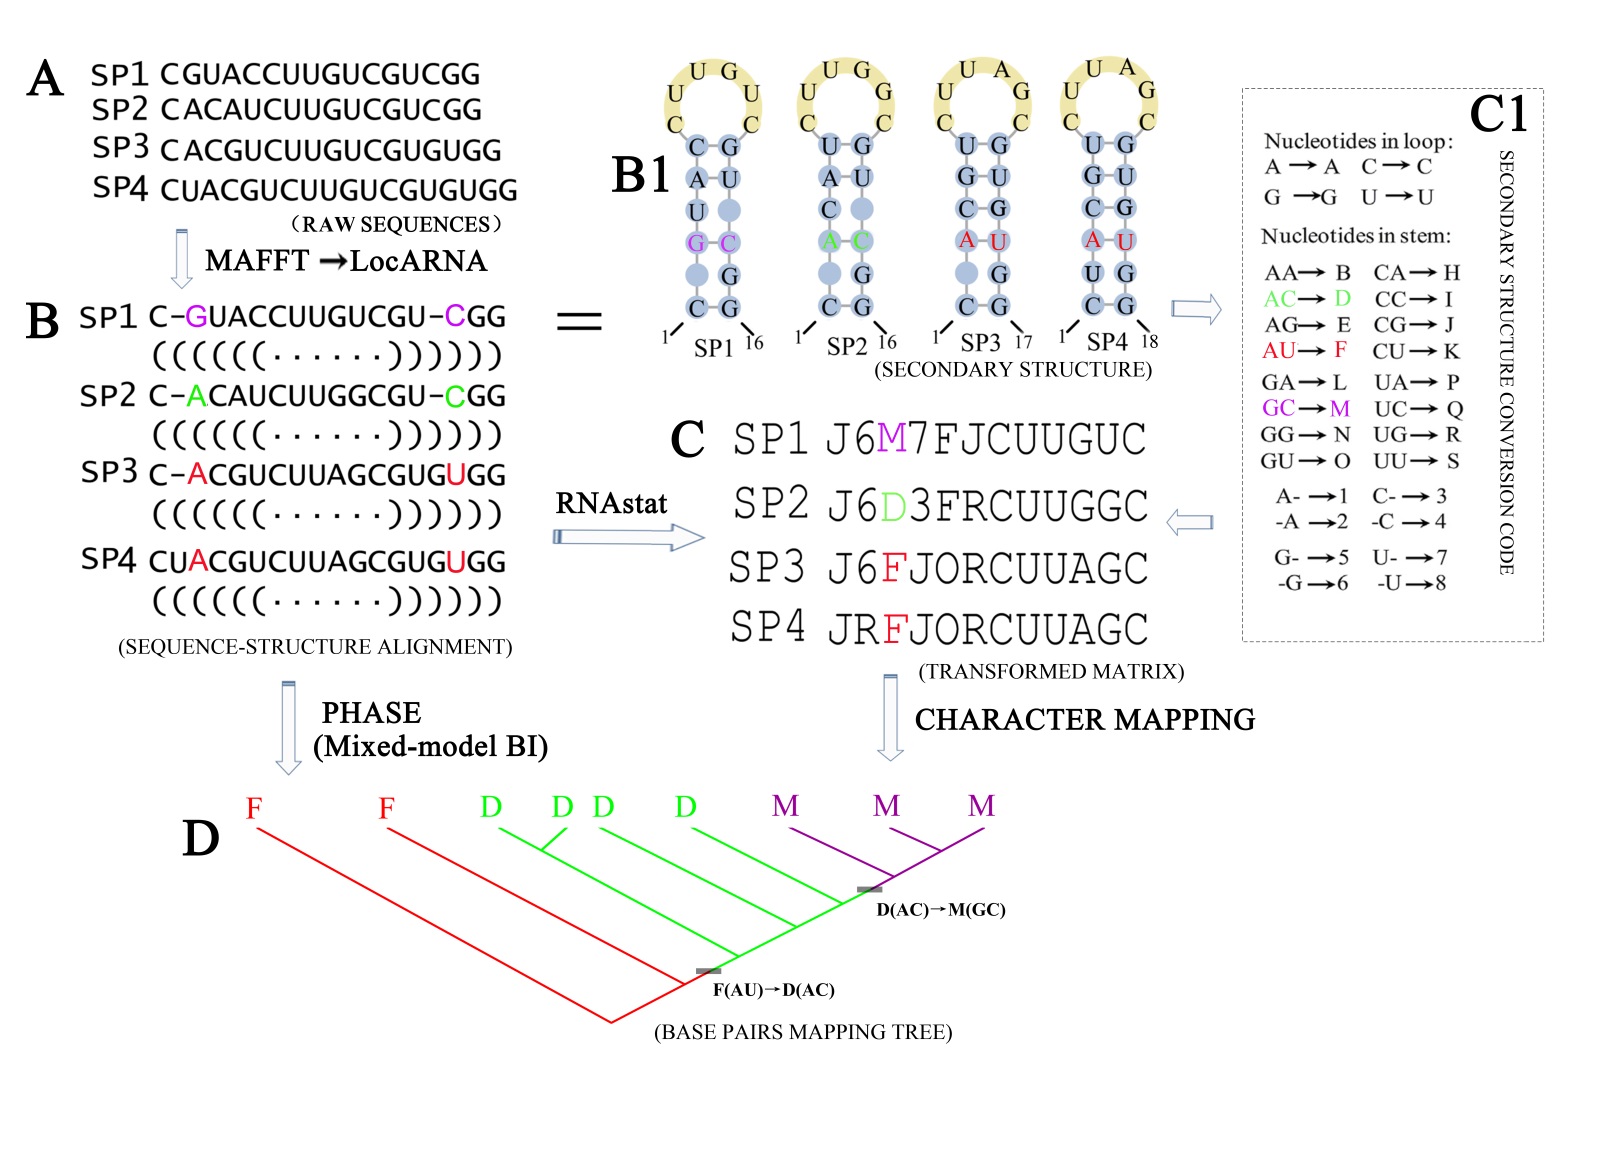
**

**FIGURE S4.** A workflow illustrating how base-pair information was mapped onto the Bayesian consensus trees to infer the AC- and CA-mediated compensatory base changes (CBCs). *(A)* Raw sequences of three ingroup species and one outgroup species (SP4). *(B)* Alignment of sequences and their corresponding consensus secondary structures. The paired and unpaired nucleotides are indicated in parentheses and dots, respectively. An example of two nucleotides that together form a base pair is colored; the secondary structure is also shown in subfigure B1. *(C)* The secondary-structure base-pair information was coded by RNAstat and transformed into character states by using the secondary-structure conversion code in subfigure C1. The paired bases highlighted in subfigure B were merged into a single character that is shown in the transformed matrix. *(D)* A Bayesian consensus tree with character states from the example base-pair mapped on it (for nine species in this case rather than the original four shown in subfigure A). The Bayesian consensus tree is generated from the sequence-structure alignment by using a mixed model implemented in the PHASE package.


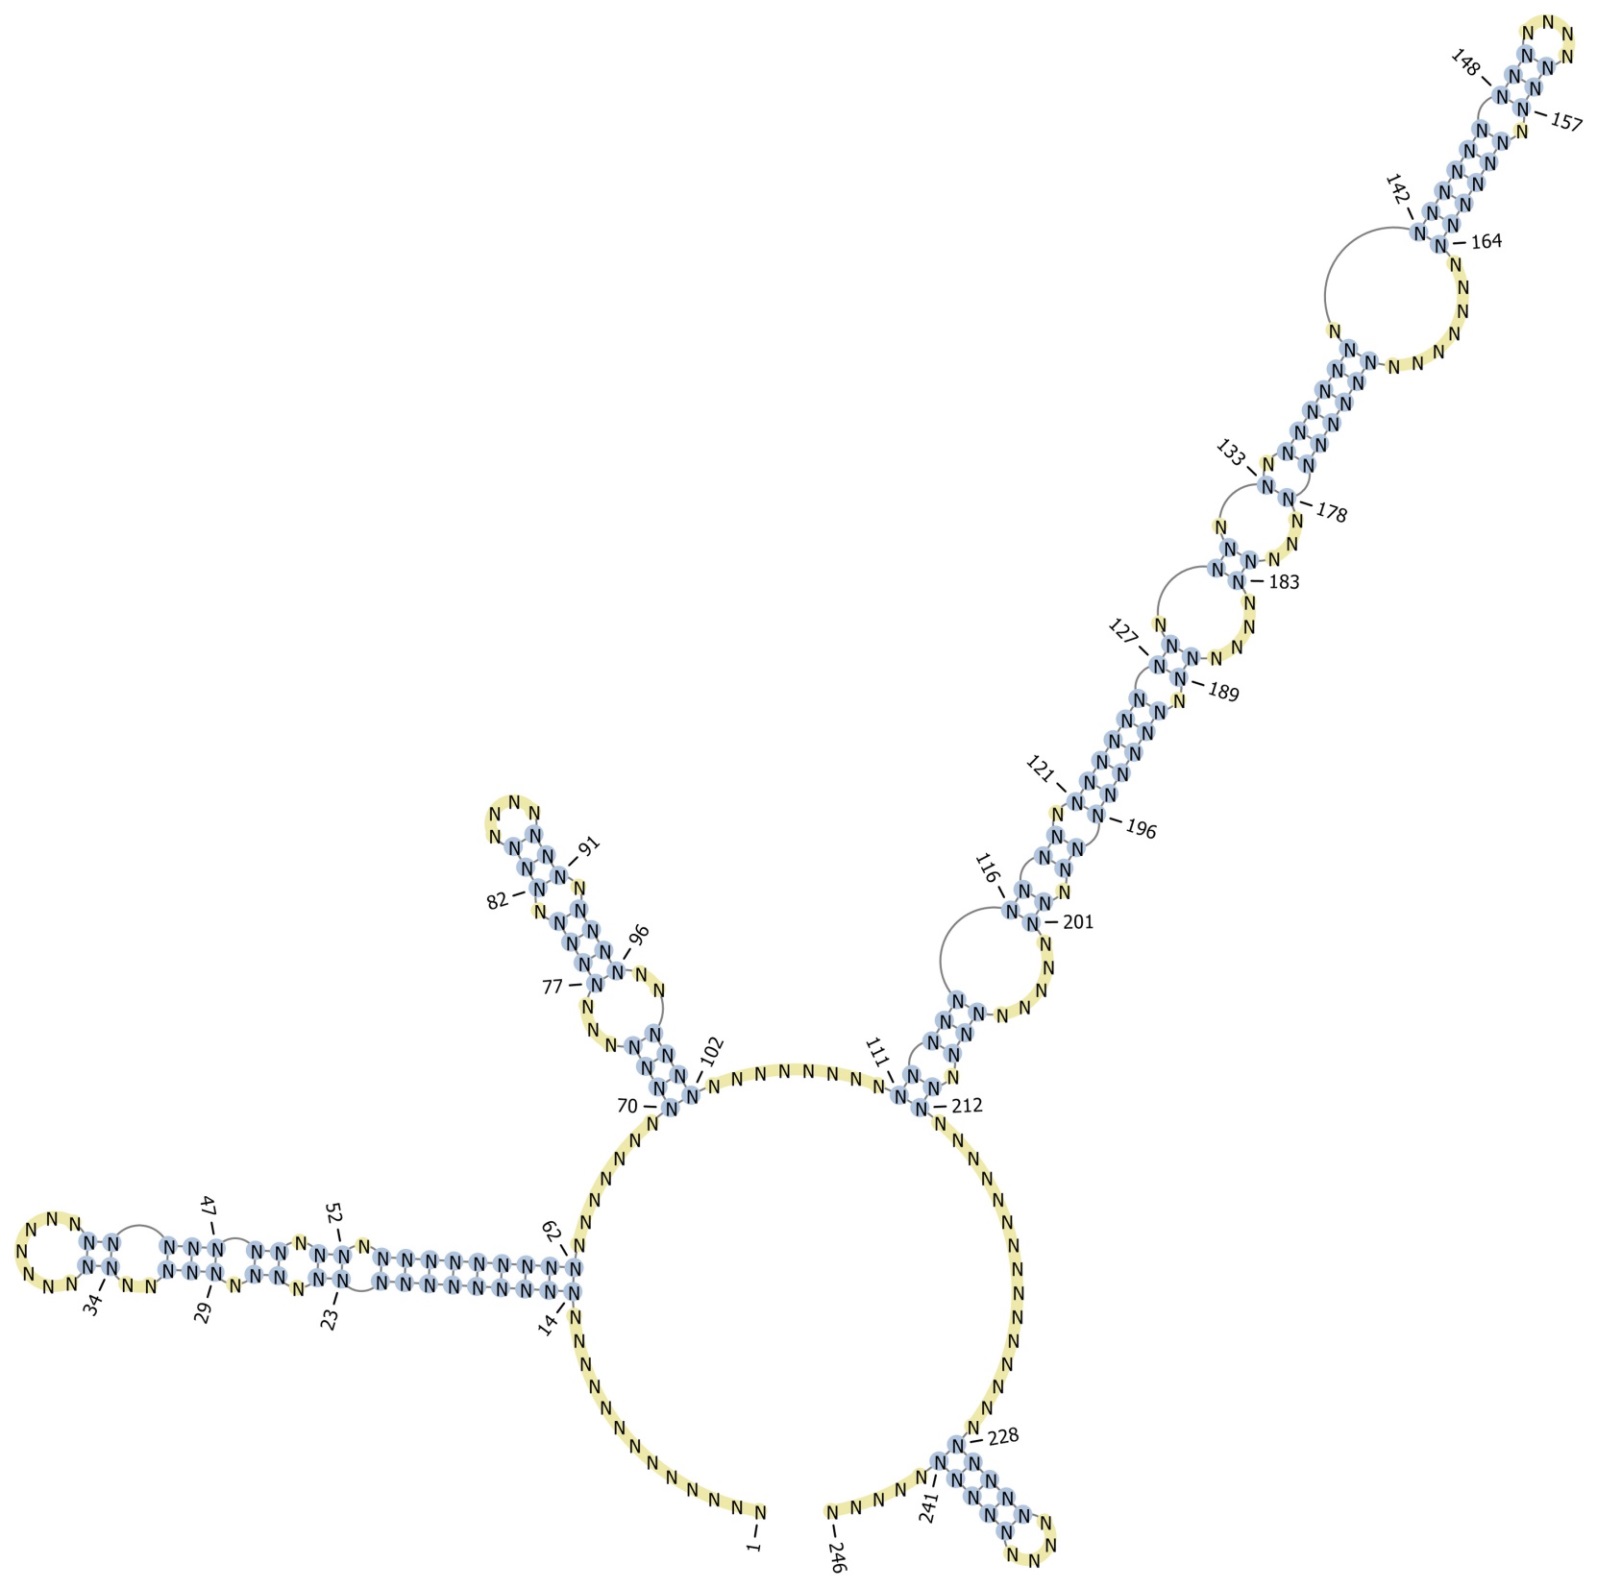


**FIGURE S5.** An example of ITS2 consensus secondary structure from *Actinida*. The blue and yellow shades indicate the paired and unpaired bases, respectively. Ns indicate one of the four Watson-Crick bases and the number indicates the base position.

Table S1. An example of the RNA16D model-parameter values from *Acer*, showing base pair changes, substitution rates and equilibrium frequency of each base

| Base  pair | **Elements of the rate matrix** | | | | | | | | | | | | | | | | | |
| --- | --- | --- | --- | --- | --- | --- | --- | --- | --- | --- | --- | --- | --- | --- | --- | --- | --- | --- |
| GC | CG | AU | UA | GU | UG | CC | GG | AG | GA | AA | CU | UC | UU | AC | CA | **Mutability** | **Frequency** |
| GC | ------ | 0.0000 | 0.0000 | 0.0000 | 0.2234 | 0.0000 | 0.0513 | 0.0513 | 0.0000 | 0.0310 | 0.0000 | 0.0000 | 0.0285 | 0.0000 | 0.1185 | 0.0000 | 0.5040 | 0.2565 |
| CG | 0.0000 | ------ | 0.0000 | 0.0000 | 0.0000 | 0.2234 | 0.0513 | 0.0513 | 0.0310 | 0.0000 | 0.0000 | 0.0285 | 0.0000 | 0.0000 | 0.0000 | 0.1185 | 0.5040 | 0.2565 |
| AU | 0.0000 | 0.0000 | ------ | 0.0000 | 0.4022 | 0.0000 | 0.0000 | 0.0000 | 0.0513 | 0.0000 | 0.0310 | 0.0513 | 0.0000 | 0.0285 | 0.1963 | 0.0000 | 0.7606 | 0.0860 |
| UA | 0.0000 | 0.0000 | 0.0000 | ------ | 0.0000 | 0.4022 | 0.0000 | 0.0000 | 0.0000 | 0.0513 | 0.0310 | 0.0000 | 0.0513 | 0.0285 | 0.0000 | 0.1963 | 0.7606 | 0.0860 |
| GU | 0.8471 | 0.0000 | 0.5113 | 0.0000 | ------ | 0.0000 | 0.0000 | 0.0745 | 0.0000 | 0.0449 | 0.0000 | 0.0744 | 0.0000 | 0.0414 | 0.0000 | 0.0000 | 1.5936 | 0.0676 |
| UG | 0.0000 | 0.8471 | 0.0000 | 0.5113 | 0.0000 | ------ | 0.0000 | 0.0745 | 0.0449 | 0.0000 | 0.0000 | 0.0000 | 0.0744 | 0.0414 | 0.0000 | 0.0000 | 1.5936 | 0.0676 |
| CC | 0.4533 | 0.4533 | 0.0000 | 0.0000 | 0.0000 | 0.0000 | ------ | 0.0000 | 0.0000 | 0.0000 | 0.0000 | 0.3242 | 0.3242 | 0.0000 | 0.0920 | 0.0920 | 1.7390 | 0.0290 |
| GG | 0.4532 | 0.4532 | 0.0000 | 0.0000 | 0.1735 | 0.1735 | 0.0000 | ------ | 0.3522 | 0.3522 | 0.0000 | 0.0000 | 0.0000 | 0.0000 | 0.0000 | 0.0000 | 1.9578 | 0.0290 |
| AG | 0.0000 | 0.4532 | 0.2518 | 0.0000 | 0.0000 | 0.1735 | 0.0000 | 0.5838 | ------ | 0.0000 | 0.3522 | 0.0000 | 0.0000 | 0.0000 | 0.1525 | 0.0000 | 1.9670 | 0.0175 |
| GA | 0.4532 | 0.0000 | 0.0000 | 0.2518 | 0.1735 | 0.0000 | 0.0000 | 0.5838 | 0.0000 | ------ | 0.3522 | 0.0000 | 0.0000 | 0.0000 | 0.0000 | 0.1525 | 1.9670 | 0.0175 |
| AA | 0.0000 | 0.0000 | 0.2518 | 0.2518 | 0.0000 | 0.0000 | 0.0000 | 0.0000 | 0.5838 | 0.5838 | ------ | 0.0000 | 0.0000 | 0.0000 | 0.1525 | 0.1525 | 1.9762 | 0.0106 |
| CU | 0.0000 | 0.4533 | 0.2735 | 0.0000 | 0.3123 | 0.0000 | 0.5836 | 0.0000 | 0.0000 | 0.0000 | 0.0000 | ------ | 0.0000 | 0.3242 | 0.0000 | 0.0920 | 2.0389 | 0.0161 |
| UC | 0.4533 | 0.0000 | 0.0000 | 0.2735 | 0.0000 | 0.3123 | 0.5836 | 0.0000 | 0.0000 | 0.0000 | 0.0000 | 0.0000 | ------ | 0.3242 | 0.0920 | 0.0000 | 2.0389 | 0.0161 |
| UU | 0.0000 | 0.0000 | 0.2735 | 0.2735 | 0.3123 | 0.3123 | 0.0000 | 0.0000 | 0.0000 | 0.0000 | 0.0000 | 0.5836 | 0.5836 | ------ | 0.0000 | 0.0000 | 2.3388 | 0.0090 |
| AC | 1.7354 | 0.0000 | 0.9639 | 0.0000 | 0.0000 | 0.0000 | 0.1525 | 0.0000 | 0.1525 | 0.0000 | 0.0920 | 0.0000 | 0.0847 | 0.0000 | ------ | 0.0000 | 3.1810 | 0.0175 |
| CA | 0.0000 | 1.7354 | 0.0000 | 0.9639 | 0.0000 | 0.0000 | 0.1525 | 0.0000 | 0.0000 | 0.1525 | 0.0920 | 0.0847 | 0.0000 | 0.0000 | 0.0000 | ------ | 3.1810 | 0.0175 |

Table S2. Comparison of substitution elements involving AC and GU intermediate base pairs in the best-fit double-substitution rate matrix of AU to GC compensatory substitutions

| Matrix | Best fit model | GU elementsa | | | | | | | | AC elements | | | | | |
| --- | --- | --- | --- | --- | --- | --- | --- | --- | --- | --- | --- | --- | --- | --- | --- |
| Frequency | Mutability | α(AU→GU) | β(GU→GC) | α*β | β/α |  | Frequency | | Mutability | μ（AU→AC） | γ（AC→GC) | μ*γ | γ/μ |
| Acer | 16C | 0.0545 | 2.0823 | 0.2685 | 1.1664 | 0.3132 | 4.3441 | | 0.0161 | | 2.0305 | 0.0672 | 0.9893 | 0.0665 | 14.7217 |
| Acorus | 16C | 0.0564 | 1.4273 | 0.1297 | 0.7831 | 0.1016 | 6.0378 | | 0.0044 | | 8.7943 | 0.0739 | 5.7296 | 0.4234 | 77.5318 |
| Actaea | 16C | 0.0670 | 2.5823 | 0.3349 | 1.2798 | 0.4286 | 3.8214 | | 0.0098 | | 2.9140 | 0.0572 | 1.5022 | 0.0859 | 26.2622 |
| Actinidia | 16C | 0.0809 | 1.9914 | 0.3924 | 0.9326 | 0.3660 | 2.3767 | | 0.0101 | | 2.2330 | 0.0607 | 1.1543 | 0.0701 | 19.0165 |
| Ajania | 16C | 0.0418 | 1.3926 | 0.1427 | 0.6074 | 0.0867 | 4.2565 | | 0.0034 | | 6.2896 | 0.0643 | 3.3975 | 0.2185 | 52.8383 |
| Allium | 16C | 0.1083 | 1.5252 | 0.5341 | 0.8736 | 0.4666 | 1.6356 | | 0.0105 | | 0.0895 | 0.0031 | 0.0529 | 0.0002 | 17.0645 |
| Amomum | 16C | 0.1338 | 1.1848 | 0.4622 | 0.5183 | 0.2396 | 1.1214 | | 0.0187 | | 1.1311 | 0.0747 | 0.5994 | 0.0448 | 8.0241 |
| Angelica | 16C | 0.0558 | 4.8572 | 0.5919 | 3.0691 | 1.8166 | 5.1852 | | 0.0022 | | 0.2641 | 0.0013 | 0.1673 | 0.0002 | 128.6923 |
| Aquilaria | 16C | 0.0644 | 1.4251 | 0.1513 | 0.5689 | 0.0861 | 3.7601 | | 0.0043 | | 8.4426 | 0.0762 | 4.3137 | 0.3287 | 56.6102 |
| Aralia | 16C | 0.0463 | 2.6126 | 0.2784 | 1.5974 | 0.4447 | 5.7378 | | 0.0099 | | 2.4917 | 0.0540 | 1.4405 | 0.0778 | 26.6759 |
| Asarum | **16C** | **0.1023** | **1.1220** | **0.0020** | **0.0051** | **0.0000** | **2.5500** | | **0.0046** | | **0.0001** | **0.0000** | **0.0001** | **0.0000** | **None** |
| Astilbe | 16C | 0.0380 | 2.6214 | 0.1931 | 1.6657 | 0.3216 | 8.6261 | | 0.0070 | | 4.0536 | 0.0586 | 2.7319 | 0.1601 | 46.6195 |
| Astragalus | 16C | 0.0942 | 1.5949 | 0.4090 | 1.0231 | 0.4184 | 2.5015 | | 0.0040 | | 3.8332 | 0.0468 | 2.7815 | 0.1302 | 59.4338 |
| Betula | 16C | 0.0740 | 2.4928 | 0.6004 | 1.5876 | 0.9532 | 2.6442 | | 0.0020 | | 4.7844 | 0.0327 | 3.1882 | 0.1043 | 97.4985 |
| Buglossoides | 16C | 0.0831 | 0.8358 | 0.1429 | 0.2905 | 0.0415 | 2.0329 | | 0.0083 | | 3.4135 | 0.0895 | 1.8152 | 0.1625 | 20.2816 |
| Bupleurum | 16C | 0.0881 | 2.6912 | 0.5897 | 1.7011 | 1.0031 | 2.8847 | | 0.0031 | | 0.2419 | 0.0020 | 0.1633 | 0.0003 | 81.6500 |
| Calystegia | 16C | 0.0652 | 1.4094 | 0.2133 | 0.8632 | 0.1841 | 4.0469 | | 0.0095 | | 2.6372 | 0.0737 | 2.0418 | 0.1505 | 27.7042 |
| Caragana | 16C | 0.0319 | 1.1009 | 0.0896 | 0.5731 | 0.0513 | 6.3962 | | 0.0110 | | 2.2153 | 0.0758 | 1.4031 | 0.1064 | 18.5106 |
| Carex | 16C | 0.0862 | 1.9376 | 0.3508 | 1.3868 | 0.4865 | 3.9532 | | 0.0056 | | 4.7320 | 0.0549 | 3.3514 | 0.1840 | 61.0455 |
| Celastrus | 16C | 0.0688 | 1.3604 | 0.1909 | 0.8220 | 0.1569 | 4.3059 | | 0.0066 | | 4.2131 | 0.0713 | 3.2190 | 0.2295 | 45.1473 |
| Ceratophyllum | 16C | 0.0820 | 1.4470 | 0.3104 | 0.9674 | 0.3003 | 3.1166 | | 0.0042 | | 5.2007 | 0.0640 | 3.9073 | 0.2501 | 61.0516 |
| Chaetanthera | 16C | 0.0913 | 1.5403 | 0.4058 | 1.1088 | 0.4500 | 2.7324 | | 0.0105 | | 2.1230 | 0.0378 | 0.9019 | 0.0341 | 23.8598 |
| Chloranthus | 16A | 0.1045 | 1.0739 | 0.2911 | 0.5629 | 0.1639 | 1.9337 | | 0.0436 | | 2.8878 | 0.3730 | 1.7285 | 0.6447 | 4.6340 |
| Circaea | 16C | 0.0617 | 1.3965 | 0.1600 | 0.7333 | 0.1173 | 4.5831 | | 0.0029 | | 9.9989 | 0.0760 | 7.5018 | 0.5701 | 98.7079 |
| Citrus | 16A | 0.0746 | 1.3429 | 0.2549 | 0.9573 | 0.2440 | 3.7556 | | 0.0194 | | 2.4067 | 0.1430 | 2.0679 | 0.2957 | 14.4608 |
| Cuscuta | 16C | 0.1489 | 0.8292 | 0.3293 | 0.3631 | 0.1196 | 1.1026 | | 0.0197 | | 2.2449 | 0.0596 | 0.4973 | 0.0296 | 8.3440 |
| Dahlia | 16C | 0.1428 | 0.9135 | 0.3333 | 0.5328 | 0.1776 | 1.5986 | | 0.0060 | | 3.6706 | 0.0619 | 2.3585 | 0.1460 | 38.1018 |
| Dendropanax | 16C | 0.0602 | 1.4972 | 0.1913 | 0.8274 | 0.1583 | 4.3251 | | 0.0076 | | 3.6742 | 0.0679 | 2.3217 | 0.1576 | 34.1929 |
| Draba | 16C | 0.1196 | 1.4869 | 0.3442 | 0.8913 | 0.3068 | 2.5895 | | 0.0058 | | 4.6004 | 0.0599 | 3.2160 | 0.1926 | 53.6895 |
| Dysosma | 16C | 0.0661 | 1.2679 | 0.2244 | 0.7221 | 0.1620 | 3.2179 | | 0.0044 | | 4.5446 | 0.0688 | 3.3371 | 0.2296 | 48.5044 |
| Epimedium | 16A | 0.1042 | 1.3932 | 0.4321 | 0.8554 | 0.3696 | 1.9796 | | 0.0028 | | 1.1030 | 0.0102 | 0.7510 | 0.0077 | 73.6275 |
| Erysimum | 16C | 0.0758 | 1.9446 | 0.2639 | 0.9559 | 0.2523 | 3.6222 | | 0.0084 | | 4.2768 | 0.0747 | 2.4434 | 0.1825 | 32.7095 |
| Flaveria | 16C | 0.0975 | 1.1879 | 0.2644 | 0.4346 | 0.1149 | 1.6437 | | 0.0074 | | 2.9540 | 0.0608 | 1.3091 | 0.0796 | 21.5313 |
| Fraxinus | **16C** | **0.0535** | **1.1732** | **0.0004** | **0.0021** | **0.0000** | **5.2500** | | **0.0011** | | **0.0001** | **0.0000** | **0.0001** | **0.0000** | **None** |
| Garrya | 16C | 0.0428 | 4.6652 | 0.4969 | 3.6392 | 1.8083 | 7.3238 | | 0.0004 | | 6.5363 | 0.0059 | 5.2616 | 0.0310 | 891.7966 |
| Goodyera | 16C | 0.0895 | 1.1878 | 0.2618 | 0.3989 | 0.1044 | 1.5237 | | 0.0056 | | 4.3429 | 0.0688 | 1.6673 | 0.1147 | 24.2340 |
| Gossypium | 16C | 0.0297 | 1.3946 | 0.0882 | 0.7941 | 0.0700 | 9.0034 | | 0.0035 | | 7.0412 | 0.0664 | 5.0413 | 0.3347 | 75.9232 |
| Habenaria | 16C | 0.1343 | 1.1116 | 0.3562 | 0.2756 | 0.0982 | 0.7737 | | 0.0053 | | 3.7570 | 0.0583 | 1.1343 | 0.0661 | 19.4563 |
| Hemsleya | 16A | 0.0158 | 3.6021 | 0.1281 | 2.5106 | 0.3216 | 19.5988 | | 0.0019 | | 4.4533 | 0.0216 | 3.4499 | 0.0745 | 159.7176 |
| Holcoglossum | 16C | 0.0447 | 1.3002 | 0.1361 | 0.7402 | 0.1007 | 5.4386 | | 0.0055 | | 4.1567 | 0.0670 | 2.9817 | 0.1998 | 44.5030 |
| Hypericum | 16C | 0.0398 | 1.4102 | 0.1259 | 0.6912 | 0.0870 | 5.4901 | | 0.0149 | | 2.4862 | 0.0725 | 1.0607 | 0.0769 | 14.6303 |
| Kadsura | 16A | 0.1050 | 0.9136 | 0.4183 | 0.6733 | 0.2816 | 1.6096 | | 0.0412 | | 1.3039 | 0.2342 | 0.9613 | 0.2251 | 4.1046 |
| Ligustrum | 16C | 0.0841 | 1.5828 | 0.3205 | 0.7441 | 0.2385 | 2.3217 | | 0.0016 | | 9.5327 | 0.0394 | 4.9497 | 0.1950 | 125.6269 |
| Lithospermum | 16C | 0.0971 | 1.2229 | 0.2726 | 0.6843 | 0.1865 | 2.5103 | | 0.0044 | | 4.9581 | 0.0587 | 3.2602 | 0.1914 | 55.5400 |
| Malus | 16A | 0.0473 | 1.3046 | 0.1535 | 0.7053 | 0.1083 | 4.5948 | | 0.0277 | | 2.8169 | 0.1446 | 1.1353 | 0.1642 | 7.8513 |
| Meconopsis | 16C | 0.1050 | 1.0012 | 0.3056 | 0.4434 | 0.1355 | 1.4509 | | 0.0210 | | 1.2960 | 0.0729 | 0.5289 | 0.0386 | 7.2551 |
| Melampodium | 16A | 0.0858 | 1.3346 | 0.2606 | 0.6234 | 0.1625 | 2.3922 | | 0.0141 | | 2.2760 | 0.0681 | 0.9943 | 0.0677 | 14.6006 |
| Meliosma | 16A | 0.0563 | 1.8782 | 0.2317 | 0.9512 | 0.2204 | 4.1053 | | 0.0199 | | 3.8506 | 0.1628 | 1.8930 | 0.3082 | 11.6278 |
| Morus | 16C | 0.0546 | 0.8102 | 0.1020 | 0.2438 | 0.0249 | 2.3902 | | 0.0072 | | 3.0895 | 0.0820 | 1.4925 | 0.1224 | 18.2012 |
| Myricaria | 16C | 0.1123 | 1.1827 | 0.2963 | 0.4803 | 0.1423 | 1.6210 | | 0.0074 | | 3.4404 | 0.0737 | 1.8009 | 0.1327 | 24.4355 |
| Nepenthes | 16C | 0.0913 | 1.4117 | 0.3203 | 0.8233 | 0.2637 | 2.5704 | | 0.0148 | | 1.9381 | 0.0748 | 1.1840 | 0.0886 | 15.8289 |
| Nymphaea | 16C | 0.0979 | 1.5318 | 0.3288 | 0.9204 | 0.3026 | 2.7993 | | 0.0099 | | 2.6587 | 0.0534 | 1.4853 | 0.0793 | 27.8146 |
| Oreocharis | 16A | 0.0840 | 0.9270 | 0.1455 | 0.2387 | 0.0347 | 1.6405 | | 0.0175 | | 1.8153 | 0.1127 | 0.8877 | 0.1000 | 7.8767 |
| Paeonia | 16C | 0.0531 | 1.3655 | 0.1929 | 0.5023 | 0.0969 | 2.6039 | | 0.0085 | | 2.8443 | 0.0735 | 1.1982 | 0.0881 | 16.3020 |
| Panax | 16C | 0.1020 | 0.7129 | 0.1425 | 0.2815 | 0.0401 | 1.9754 | | 0.0123 | | 4.5222 | 0.0643 | 1.0523 | 0.0677 | 16.3655 |
| Paphiopedilum | 16C | 0.0846 | 3.5009 | 0.6771 | 1.8713 | 1.2671 | 2.7637 | | 0.0025 | | 0.3389 | 0.0020 | 0.1822 | 0.0004 | 91.1000 |
| Paris | 16C | 0.1305 | 1.0366 | 0.3111 | 0.5396 | 0.1679 | 1.7345 | | 0.0060 | | 4.4309 | 0.0575 | 2.1828 | 0.1255 | 37.9617 |
| Parnassia | 16C | 0.0963 | 1.3980 | 0.3175 | 0.6592 | 0.2093 | 2.0762 | | 0.0170 | | 2.0120 | 0.0662 | 0.7772 | 0.0515 | 11.7402 |
| Persicaria | 16A | 0.0371 | 2.1903 | 0.2229 | 1.5453 | 0.3444 | 6.9327 | | 0.0280 | | 1.8081 | 0.1151 | 1.0553 | 0.1215 | 9.1685 |
| Peucedanum | 16C | 0.0845 | 1.5421 | 0.3269 | 0.7052 | 0.2305 | 2.1572 | | 0.0119 | | 2.9812 | 0.0587 | 0.9020 | 0.0529 | 15.3663 |
| Pinellia | 16A | 0.0565 | 2.7948 | 0.4056 | 2.2109 | 0.8967 | 5.4509 | | 0.0191 | | 3.3874 | 0.1091 | 1.7617 | 0.1922 | 16.1476 |
| Plantago | 16C | 0.0750 | 1.5818 | 0.3143 | 0.8684 | 0.2729 | 2.7630 | | 0.0134 | | 1.6024 | 0.0598 | 0.9211 | 0.0551 | 15.4030 |
| Potentilla | 16C | 0.0635 | 2.1102 | 0.3665 | 1.4327 | 0.5251 | 3.9091 | | 0.0032 | | 0.1433 | 0.0013 | 0.0981 | 0.0001 | 75.4615 |
| Pulmonaria | 16C | 0.0754 | 0.7426 | 0.1005 | 0.2350 | 0.0236 | 2.3383 | | 0.0055 | | 4.6643 | 0.0852 | 2.7374 | 0.2332 | 32.1291 |
| Rhodiola | **16C** | **0.0851** | **0.9156** | **0.0082** | **0.0282** | **0.0002** | **3.4390** | | **0.0022** | | **0.0025** | **0.0000** | **0.0015** | **0.0000** | **None** |
| Rhododendron | 16C | 0.1062 | 1.5447 | 0.3822 | 0.6270 | 0.2396 | 1.6405 | | 0.0031 | | 6.7786 | 0.0590 | 3.2763 | 0.1933 | 55.5305 |
| Sagittaria | 16C | 0.1734 | 1.0135 | 0.6112 | 0.5224 | 0.3193 | 0.8547 | | 0.0055 | | 1.4560 | 0.0331 | 0.8912 | 0.0295 | 26.9245 |
| Senecio | 16A | 0.1037 | 0.9350 | 0.3471 | 0.4798 | 0.1665 | 1.3823 | | 0.0316 | | 1.0136 | 0.1058 | 0.4808 | 0.0509 | 4.5444 |
| Sinosenecio | 16A | 0.0881 | 1.0281 | 0.2674 | 0.4473 | 0.1196 | 1.6728 | | 0.0262 | | 1.9944 | 0.1520 | 0.8568 | 0.1302 | 5.6368 |
| Solanum | 16A | 0.0282 | 2.2032 | 0.1538 | 1.5240 | 0.2344 | 9.9090 | | 0.0543 | | 1.7102 | 0.2220 | 1.1417 | 0.2535 | 5.1428 |
| Stachyurus | 16C | 0.0748 | 1.6186 | 0.2646 | 1.0655 | 0.2819 | 4.0268 | | 0.0184 | | 1.9471 | 0.0891 | 1.4566 | 0.1298 | 16.3479 |
| Staphylea | 16C | 0.0418 | 2.8928 | 0.2634 | 1.7300 | 0.4557 | 6.5680 | | 0.0070 | | 3.8748 | 0.0623 | 2.4363 | 0.1518 | 39.1059 |
| Stewartia | 16C | 0.0612 | 1.6471 | 0.2060 | 0.8888 | 0.1831 | 4.3146 | | 0.0041 | | 6.2753 | 0.0614 | 3.9847 | 0.2447 | 64.8974 |
| Swertia | 16A | 0.0991 | 1.2406 | 0.2965 | 0.8143 | 0.2414 | 2.7464 | | 0.0205 | | 2.3887 | 0.1260 | 1.6732 | 0.2108 | 13.2794 |
| Symphytum | 16A | 0.0920 | 1.8497 | 0.3387 | 0.6536 | 0.2214 | 1.9297 | | 0.0008 | | 3.8031 | 0.0072 | 1.5490 | 0.0112 | 215.1389 |
| Tripterospermum | 16C | 0.0761 | 1.1996 | 0.1907 | 0.5291 | 0.1009 | 2.7745 | | 0.0032 | | 8.4288 | 0.0708 | 4.7370 | 0.3354 | 66.9068 |
| Urtica | 16C | 0.0682 | 3.1169 | 0.5063 | 2.4763 | 1.2538 | 4.8910 | | 0.0049 | | 0.2494 | 0.0031 | 0.2116 | 0.0007 | 68.2581 |
| Viburnum | **16A** | **0.0366** | **1.0982** | **0.0004** | **0.0030** | **0.0000** | **7.5000** | | **0.0101** | | **0.0003** | **0.0000** | **0.0002** | **0.0000** | **None** |
| Vicia | 16A | 0.1031 | 2.3825 | 0.6815 | 1.4340 | 0.9773 | 2.1042 | | 0.0005 | | 0.1085 | 0.0001 | 0.0656 | 0.0000 | 656.0000 |
| Zelkova | 16A | 0.0499 | 0.9391 | 0.1028 | 0.6277 | 0.0645 | 6.1060 | | 0.0469 | | 1.9665 | 0.1874 | 1.2172 | 0.2281 | 6.4952 |
| Average |  | 0.0786±0.0302 | 1.6389±0.8052 | 0.2828±0.1530 | 0.9064±0.6549 | 0.3066±0.3576 | 3.6924±2.6677 | | 0.0111±0.0108 | | 3.2122±2.2888 | 0.0701±0.0581 | 1.8800±1.5244 | 0.1367±0.1233 | 56.6390±123.1190 |

a α and β represent the substitution rate between AU (UA) and GU (UG) and GU (UG) and GC (CG), respectively, in GU (UG)-mediated compensatory base changes (CBCs). α*β represents total probabilities of GU-mediated CBCs between AU and GC, β/α represents the degree of rate variation between the single substitutions. Likewise, μ and γ represent the substitution rate between AU (UA) and AC (CA) and between AC (CA) and GC (CG), respectively, in the AC (CA)-mediated CBCs. μ*γ represents the total probability for CBCs between AU (UA) and GC (CG), whereas γ/μ represents the degree of rate variation between the single substitutions. The lineages highlighted in bold and underlined font have extreme minimum and maximum values, respectively, and are not included in Fig.1C.

Table S3. The CBC-base-pair distribution among the 65 lineages with inferred CBCs

| Matrix | **# of sampled species** | **# of stem characters** | **# of characters including two CBC states** | |  | **# of positions also including AC or CA** | |  | **# of positions also including GU or UG** | |  | **# of positions also including both AC or CA and GU or UG** |
| --- | --- | --- | --- | --- | --- | --- | --- | --- | --- | --- | --- | --- |
| AU-GC  or  UA-CG | AU-GC  and  UA-CG |  | AU-AC-GC or UA-CA-CG | AU-AC-GC and UA-CA-CG |  | AU-GU-GC or UA-UG-CG | AU-GU-GC and UA-UG-CG |  |
| Acer | 117 | 66 | 8 | 0 |  | 1 | 0 |  | 4 | 0 |  | 3 |
| Acorus | 7 | 72 | 1 | 0 |  | 0 | 0 |  | 0 | 0 |  | 0 |
| Actaea | 21 | 63 | 2 | 0 |  | 0 | 0 |  | 2 | 0 |  | 0 |
| Actinidia | 40 | 69 | 12 | 0 |  | 0 | 0 |  | 7 | 0 |  | 4 |
| Ajania | 29 | 70 | 1 | 0 |  | 0 | 0 |  | 1 | 0 |  | 0 |
| Allium | 405 | 55 | 29 | 1 |  | 0 | 0 |  | 9 | 0 |  | 20 |
| Amomum | 73 | 70 | 12 | 0 |  | 0 | 0 |  | 6 | 0 |  | 6 |
| Angelica | 67 | 63 | 8 | 0 |  | 0 | 0 |  | 4 | 0 |  | 2 |
| Aralia | 43 | 73 | 5 | 0 |  | 0 | 0 |  | 3 | 0 |  | 1 |
| Asarum | 93 | 73 | 2 | 0 |  | 0 | 0 |  | 1 | 0 |  | 1 |
| Astilbe | 14 | 78 | 5 | 0 |  | 2 | 0 |  | 2 | 0 |  | 1 |
| Astragalus | 37 | 74 | 5 | 0 |  | 0 | 0 |  | 4 | 0 |  | 1 |
| Betula | 60 | 70 | 1 | 0 |  | 0 | 0 |  | 1 | 0 |  | 0 |
| Bupleurum | 79 | 68 | 4 | 0 |  | 1 | 0 |  | 2 | 0 |  | 0 |
| Caragana | 68 | 72 | 3 | 0 |  | 0 | 0 |  | 2 | 0 |  | 0 |
| Celastrus | 30 | 65 | 7 | 0 |  | 1 | 0 |  | 1 | 0 |  | 2 |
| Ceratophyllum | 6 | 85 | 2 | 0 |  | 0 | 0 |  | 2 | 0 |  | 0 |
| Chaetanthera | 45 | 64 | 16 | 1 |  | 1 | 0 |  | 12 | 0 |  | 4 |
| Circaea | 9 | 56 | 1 | 0 |  | 1 | 0 |  | 0 | 0 |  | 0 |
| Citrus | 48 | 72 | 3 | 0 |  | 1 | 0 |  | 1 | 0 |  | 1 |
| Cuscuta | 49 | 60 | 9 | 0 |  | 1 | 0 |  | 5 | 0 |  | 2 |
| Dendropanax | 30 | 72 | 2 | 0 |  | 1 | 0 |  | 1 | 0 |  | 0 |
| Erysimum | 139 | 60 | 1 | 0 |  | 0 | 0 |  | 1 | 0 |  | 0 |
| Flaveria | 20 | 77 | 2 | 0 |  | 0 | 0 |  | 2 | 0 |  | 0 |
| Fraxinus | 41 | 58 | 3 | 0 |  | 0 | 0 |  | 2 | 0 |  | 1 |
| Goodyera | 36 | 81 | 6 | 0 |  | 0 | 0 |  | 4 | 0 |  | 2 |
| Gossypium | 44 | 68 | 2 | 0 |  | 1 | 0 |  | 1 | 0 |  | 0 |
| Habenaria | 87 | 79 | 1 | 0 |  | 0 | 0 |  | 0 | 0 |  | 0 |
| Hypericum | 79 | 68 | 14 | 0 |  | 3 | 0 |  | 6 | 0 |  | 5 |
| Ligustrum | 6 | 71 | 2 | 0 |  | 0 | 0 |  | 0 | 0 |  | 0 |
| Lithospermum | 33 | 67 | 1 | 0 |  | 0 | 0 |  | 1 | 0 |  | 0 |
| Malus | 34 | 66 | 7 | 0 |  | 3 | 0 |  | 2 | 0 |  | 2 |
| Meconopsis | 39 | 68 | 14 | 0 |  | 1 | 0 |  | 8 | 0 |  | 5 |
| Melampodium | 41 | 71 | 14 | 0 |  | 0 | 0 |  | 9 | 0 |  | 5 |
| Meliosma | 55 | 70 | 4 | 0 |  | 0 | 0 |  | 2 | 0 |  | 0 |
| Morus | 21 | 75 | 1 | 0 |  | 0 | 0 |  | 1 | 0 |  | 0 |
| Nepenthes | 91 | 70 | 15 | 0 |  | 2 | 0 |  | 7 | 0 |  | 6 |
| Nymphaea | 36 | 68 | 9 | 0 |  | 0 | 0 |  | 7 | 0 |  | 1 |
| Oreocharis | 36 | 67 | 3 | 0 |  | 0 | 0 |  | 2 | 0 |  | 0 |
| Paeonia | 32 | 73 | 4 | 0 |  | 1 | 0 |  | 3 | 0 |  | 0 |
| Panax | 16 | 73 | 3 | 0 |  | 0 | 0 |  | 3 | 0 |  | 0 |
| Paphiopedilum | 94 | 92 | 3 | 0 |  | 0 | 0 |  | 3 | 0 |  | 0 |
| Paris | 24 | 71 | 3 | 0 |  | 0 | 0 |  | 3 | 0 |  | 0 |
| Parnassia | 30 | 66 | 8 | 0 |  | 0 | 0 |  | 6 | 0 |  | 2 |
| Persicaria | 43 | 78 | 6 | 0 |  | 0 | 0 |  | 4 | 0 |  | 2 |
| Peucedanum | 68 | 62 | 6 | 0 |  | 0 | 0 |  | 6 | 0 |  | 0 |
| Pinellia | 8 | 87 | 5 | 0 |  | 1 | 0 |  | 1 | 0 |  | 1 |
| Plantago | 70 | 57 | 7 | 0 |  | 0 | 0 |  | 3 | 0 |  | 3 |
| Potentilla | 201 | 68 | 11 | 0 |  | 1 | 0 |  | 3 | 0 |  | 6 |
| Pulmonaria | 9 | 75 | 1 | 0 |  | 0 | 0 |  | 1 | 0 |  | 0 |
| Rhodiola | 66 | 67 | 5 | 0 |  | 0 | 0 |  | 1 | 0 |  | 2 |
| Rhododendron | 73 | 68 | 1 | 0 |  | 0 | 0 |  | 1 | 0 |  | 0 |
| Sagittaria | 5 | 76 | 4 | 0 |  | 0 | 0 |  | 1 | 0 |  | 0 |
| Senecio | 89 | 72 | 7 | 0 |  | 0 | 0 |  | 3 | 0 |  | 3 |
| Sinosenecio | 41 | 69 | 5 | 0 |  | 0 | 0 |  | 4 | 0 |  | 1 |
| Solanum | 34 | 63 | 5 | 0 |  | 1 | 0 |  | 3 | 0 |  | 1 |
| Stachyurus | 11 | 77 | 1 | 0 |  | 1 | 0 |  | 0 | 0 |  | 0 |
| Staphylea | 10 | 69 | 8 | 0 |  | 1 | 0 |  | 3 | 0 |  | 0 |
| Stewartia | 20 | 69 | 1 | 0 |  | 0 | 0 |  | 1 | 0 |  | 0 |
| Swertia | 50 | 69 | 6 | 0 |  | 0 | 0 |  | 2 | 0 |  | 3 |
| Symphytum | 27 | 66 | 1 | 0 |  | 0 | 0 |  | 1 | 0 |  | 0 |
| Urtica | 70 | 63 | 5 | 0 |  | 0 | 0 |  | 4 | 0 |  | 1 |
| Viburnum | 104 | 80 | 3 | 0 |  | 0 | 0 |  | 0 | 0 |  | 1 |
| Vicia | 149 | 69 | 2 | 0 |  | 0 | 0 |  | 2 | 0 |  | 0 |
| Zelkova | 6 | 65 | 3 | 0 |  | 0 | 0 |  | 2 | 0 |  | 0 |
| Sum | 3558 | 4538 | 351 | 2 |  | 26 | 0 |  | 189 | 0 |  | 101 |

Table S4. The distribution of hemi-CBCs base pairs among the 15 lineages for which no CBCs were inferred

| Matrix | **# of sampled species** | **# of stem characters** | **# of positions including AC or CA** | |  | **# of positions including GU or UG** | |  | **# of positions including both AC or CA and GU or UG** |
| --- | --- | --- | --- | --- | --- | --- | --- | --- | --- |
| Only AC-AU or AC-GC or CA-UA or CA-CG | Both AC-AU or AC-GC and CA-UA or CA-CG |  | Only GU-AU or GU-GC or UG-UA or UG-CG | Both GU-AU or GU-GC and UG-UA or UG-CG |  |
| Aquilaria | 12 | 78 | 3 | 0 |  | 3 | 0 |  | 1 |
| Buglossoides | 6 | 71 | 5 | 0 |  | 7 | 0 |  | 0 |
| Calystegia | 19 | 66 | 2 | 0 |  | 10 | 0 |  | 0 |
| Carex | 79 | 74 | 4 | 0 |  | 18 | 0 |  | 1 |
| Chloranthus | 11 | 65 | 8 | 0 |  | 9 | 0 |  | 0 |
| Dahlia | 32 | 75 | 5 | 0 |  | 18 | 0 |  | 0 |
| Draba | 55 | 61 | 8 | 0 |  | 12 | 0 |  | 0 |
| Dysosma | 7 | 76 | 5 | 0 |  | 11 | 0 |  | 1 |
| Epimedium | 60 | 76 | 3 | 0 |  | 12 | 0 |  | 1 |
| Garrya | 11 | 68 | 0 | 0 |  | 5 | 0 |  | 0 |
| Hemsleya | 24 | 74 | 3 | 0 |  | 4 | 0 |  | 0 |
| Holcoglossum | 17 | 91 | 2 | 0 |  | 7 | 0 |  | 0 |
| Kadsura | 12 | 61 | 4 | 0 |  | 5 | 0 |  | 0 |
| Myricaria | 11 | 80 | 4 | 0 |  | 7 | 0 |  | 0 |
| Tripterospermum | 20 | 74 | 4 | 0 |  | 10 | 0 |  | 0 |
| Sum | 376 | 1090 | 60 | 0 |  | 138 | 0 |  | 4 |

Table S5. Comparison of CBC-base-pair distribution between three lineages aligned separately by LocARNA and 4SALE

| **Matrix** | **# of sampled species** | **# of stem characters** | **# of characters including two CBC states** | |  | **# of positions also including AC or CA** | |  | **# of positions also including GU or UG** | |  | **# of positions also including both AC or CA and GU or UG** |
| --- | --- | --- | --- | --- | --- | --- | --- | --- | --- | --- | --- | --- |
| AU-GC  or  UA-CG | AU-GC  and  UA-CG |  | AU-AC-GC or UA-CA-CG | AU-AC-GC and UA-CA-CG |  | AU-GU-GC or UA-UG-CG | AU-GU-GC and UA-UG-CG |  |
| **LocARNAa** | | | | | | | | | | | | |
| Hypericum | 79 | 68 | 14 | 0 |  | 3 | 0 |  | 6 | 0 |  | 5 |
| Nepenthes | 91 | 70 | 15 | 0 |  | 2 | 0 |  | 7 | 0 |  | 6 |
| Potentilla | 201 | 68 | 11 | 0 |  | 1 | 0 |  | 3 | 0 |  | 6 |
| Sum | 371 | 206 | 40 | 0 |  | 6 | 0 |  | 16 | 0 |  | 17 |
| **4SALEa** | | | | | | | | | | | | |
| Hypericum | 79 | 67 | 14 | 0 |  | 4 | 0 |  | 6 | 0 |  | 2 |
| Nepenthes | 91 | 54 | 10 | 0 |  | 0 | 0 |  | 8 | 0 |  | 2 |
| Potentilla | 201 | 66 | 10 | 0 |  | 0 | 0 |  | 2 | 0 |  | 7 |
| Sum | 371 | 187 | 34 | 0 |  | 4 | 0 |  | 16 | 0 |  | 11 |

a The results from 4SALE are underlined.

Table S6. Comparison of AC base pair frequency and substitution rates from AC to other six base pairs between LocARNA- and

4SALE-alignments in each test genus

| Matrix a | AC frequency | r(AC→GC) | r(AC→AU) | r(AC→AA) | r(AC→AG) | r(AC→CC) | r(AC→UC) |
| --- | --- | --- | --- | --- | --- | --- | --- |
| Hypericum | 0.0149 | 1.0607 | 0.6551 | 0.1926 | 0.1926 | 0.1926 | 0.1926 |
| Hypericum | 0.0176 | 1.0433 | 0.3832 | 0.1234 | 0.1234 | 0.1234 | 0.1234 |
| Nepenthes | 0.0148 | 1.1840 | 0.4145 | 0.0849 | 0.0849 | 0.0849 | 0.0849 |
| Nepenthes | 0.0133 | 1.3910 | 0.3863 | 0.0199 | 0.0199 | 0.0199 | 0.0199 |
| Potentilla | 0.0032 | 0.0981 | 0.0448 | 0.0001 | 0.0001 | 0.0001 | 0.0001 |
| Potentilla | 0.0020 | 0.0571 | 0.0292 | 0.0000 | 0.0000 | 0.0000 | 0.0000 |

a The results from 4SALE are underlined.

Table S7. Comparison of average substitution elements between LocARNA- and 4SALE-alignments for three test lineages in each of eight possible compensatory substitutions

| Pathwaya | Frequency of intermediate base-pair | Mutability of intermediate base-pair | Rate from WC base-pair to intermediate base-pair | Rate from intermediate base-pair to another WC pair | Overall rate | Rate ratio |
| --- | --- | --- | --- | --- | --- | --- |
| AU→AC→GC | 0.0110 | 1.5225 | 0.0495 (μ1) | 0.7809 (γ1) | 0.0552 (μ1*γ1) | 35.3069 (γ1/μ1) |
| AU→AC→GC | 0.0110 | 1.2878 | 0.0492 (μ1) | 0.8305 (γ1) | 0.0592 (μ1*γ1) | 49.2256 (γ1/μ1) |
| AU→GU→GC | 0.0649 | 1.6440 | 0.2709 (α1) | 0.9824 (β1) | 0.2919 (α1*β1) | 3.9899 (β1/α1) |
| AU→GU→GC | 0.0680 | 1.4779 | 0.2636 (α1) | 0.8996 (β1) | 0.2655 (α1*β1) | 4.2891 (β1/α1) |
| UA→CA→CG | 0.0110 | 1.6798 | 0.0495 (μ2) | 0.8623 (γ2) | 0.0598 (μ2*γ2) | 51.8206 (γ2/μ2) |
| UA→CA→CG | 0.0110 | 1.3382 | 0.0492 (μ2) | 0.8635 (γ2) | 0.0603 (μ2*γ2) | 77.9359 (γ2/μ2) |
| UA→UG→CG | 0.0719 | 1.9559 | 0.2946 (α2) | 1.3221 (β2) | 0.4416 (α2*β2) | 4.4550 (β2/α2) |
| UA→UG→CG | 0.0937 | 1.7157 | 0.3312 (α2) | 1.2103 (β2) | 0.4294 (α2*β2) | 3.4795 (β2/α2) |
| GC→AC→AU | 0.0110 | 1.5225 | 0.0495 (μ3) | 0.3715 (γ3) | 0.0262 (μ3*γ3) | 16.3463 (γ3/μ3) |
| GC→AC→AU | 0.0110 | 1.2878 | 0.0492 (μ3) | 0.2662 (γ3) | 0.0189 (μ3*γ3) | 22.9651 (γ3/μ3) |
| GC→GU→AU | 0.0649 | 1.6440 | 0.2709 (α3) | 0.4563 (β3) | 0.1285 (α3*β3) | 2.0247 (β3/α3) |
| GC→GU→AU | 0.0680 | 1.4779 | 0.2636 (α3) | 0.3619 (β3) | 0.1119 (α3*β3) | 1.6393 (β3/α3) |
| CG→CA→UA | 0.0110 | 1.6798 | 0.0495 (μ4) | 0.4473 (γ4) | 0.0323 (μ4*γ4) | 13.0514 (γ4/μ4) |
| CG→CA→UA | 0.0110 | 1.3382 | 0.0492 (μ4) | 0.2836 (γ4) | 0.0209 (μ4*γ4) | 15.6255 (γ4/μ4) |
| CG→UG→UA | 0.0719 | 1.9559 | 0.2946 (α4) | 0.4300 (β4) | 0.1245 (α4*β4) | 1.6772 (β4/α4) |
| CG→UG→UA | 0.0937 | 1.7157 | 0.3312 (α4) | 0.2934 (β4) | 0.0999 (α4*β4) | 0.8784 (β4/α4) |
| Average | 0.0110 (AC/CA) | 1.6012 (AC/CA) | 0.0495 (μ) | 0.6155 (γ) | 0.0434 (μ*γ) | 29.1313 (γ/μ) |
| 0.0110 (AC/CA) | 1.3130(AC/CA) | 0.0492 (μ) | 0.5610 (γ) | 0.0398 (μ*γ) | 41.4380 (γ/μ) |
| 0.0684(GU/UG) | 1.8595 (GU/UG) | 0.2828 (α) | 0.7977 (β) | 0.2467 (α*β) | 3.0369 (β/α) |
|  | 0.0809(GU/UG) | 1.5969(GU/UG) | 0.2974 (α) | 0.6913 (β) | 0.2267 (α*β) | 2.5716 (β/α) |

a The eight possible pathways can be divided into four groups based on the same Watson-Crick (WC) pair-changes through different intermediate base pairs. The results are averaged across three test lineages *Hypericum*, *Nepenthes* and *Potentilla*, for which the greatest potential number of AC-mediated CBCs were inferred based on the LocARNA alignments. The comparative results from 4SALE are underlined. The substitution elements of each group are marked by the different subscript numbers used in Fig.1.

Table S8. Taxonomy and number of species and sequences sampled for the 80 studied lineages

| Order | Family | Genus | # of species | # of sequence |
| --- | --- | --- | --- | --- |
| Acorales | Acoraceae | *Acorus* | 7 | 20 |
| Alismatales | Alismataceae | *Sagittaria* | 5 | 17 |
| Alismatales | Araceae | *Pinellia* | 8 | 120 |
| Apiales | Apiaceae | *Angelica* | 67 | 517 |
| Apiales | Apiaceae | *Bupleurum* | 79 | 519 |
| Apiales | Apiaceae | *Peucedanum* | 68 | 240 |
| Apiales | Araliaceae | *Aralia* | 43 | 117 |
| Apiales | Araliaceae | *Dendropanax* | 30 | 52 |
| Apiales | Araliaceae | *Panax* | 16 | 434 |
| Asparagales | Amaryllidaceae | *Allium* | 405 | 718 |
| Asparagales | Orchidaceae | *Goodyera* | 36 | 197 |
| Asparagales | Orchidaceae | *Habenaria* | 87 | 120 |
| Asparagales | Orchidaceae | *Holcoglossum* | 17 | 104 |
| Asparagales | Orchidaceae | *Paphiopedilum* | 94 | 430 |
| Asterales | Asteraceae | *Ajania* | 29 | 64 |
| Asterales | Asteraceae | *Chaetanthera* | 45 | 82 |
| Asterales | Asteraceae | *Dahlia* | 32 | 47 |
| Asterales | Asteraceae | *Flaveria* | 20 | 67 |
| Asterales | Asteraceae | *Melampodium* | 41 | 83 |
| Asterales | Asteraceae | *Senecio* | 89 | 123 |
| Asterales | Asteraceae | *Sinosenecio* | 41 | 189 |
| Austrobaileyales | Schisandraceae | *Kadsura* | 12 | 128 |
| Boraginales | Boraginaceae | *Buglossoides* | 6 | 33 |
| Boraginales | Boraginaceae | *Lithospermum* | 33 | 62 |
| Boraginales | Boraginaceae | *Pulmonaria* | 9 | 227 |
| Boraginales | Boraginaceae | *Symphytum* | 27 | 37 |
| Brassicales | Brassicaceae | *Draba* | 55 | 122 |
| Brassicales | Brassicaceae | *Erysimum* | 139 | 269 |
| Caryophyllales | Nepenthaceae | *Nepenthes* | 91 | 183 |
| Caryophyllales | Tamaricaceae | *Myricaria* | 11 | 25 |
| Caryophyllales | Polygonaceae | *Persicaria* | 43 | 63 |
| Celastrales | Celastraceae | *Celastrus* | 30 | 115 |
| Celastrales | Celastraceae | *Parnassia* | 30 | 91 |
| Ceratophyllales | Ceratophyllaceae | *Ceratophyllum* | 6 | 40 |
| Chloranthales | Chloranthaceae | *Chloranthus* | 11 | 28 |
| Crossosomatales | Stachyuraceae | *Stachyurus* | 11 | 34 |
| Crossosomatales | Staphyleaceae | *Staphylea* | 10 | 92 |
| Cucurbitales | Cucurbitaceae | *Hemsleya* | 24 | 117 |
| Dipsacales | Adoxaceae | *Viburnum* | 104 | 220 |
| Ericales | Actinidiaceae | *Actinidia* | 40 | 182 |
| Ericales | Ericaceae | *Rhododendron* | 73 | 126 |
| Ericales | Theaceae | *Stewartia* | 20 | 114 |
| Fabales | Fabaceae | *Astragalus* | 37 | 93 |
| Fabales | Leguminosae | *Caragana* | 68 | 173 |
| Fabales | Leguminosae | *Vicia* | 149 | 643 |
| Fagales | Betulaceae | *Betula* | 60 | 261 |
| Garryales | Garryaceae | *Garrya* | 11 | 23 |
| Garryales | Garryaceae | *Gossypium* | 44 | 280 |
| Gentianales | Gentianaceae | *Swertia* | 50 | 64 |
| Gentianales | Gentianaceae | *Tripterospermum* | 20 | 24 |
| Lamiales | Gesneriaceae | *Oreocharis* | 36 | 59 |
| Lamiales | Oleaceae | *Fraxinus* | 41 | 265 |
| Lamiales | Oleaceae | *Ligustrum* | 6 | 19 |
| Lamiales | Plantaginaceae | *Plantago* | 70 | 123 |
| Liliales | Melanthiaceae | *Paris* | 24 | 171 |
| Malpighiales | Hypericaceae | *Hypericum* | 79 | 103 |
| Malvales | Thymelaeaceae | *Aquilaria* | 12 | 200 |
| Myrtales | Onagraceae | *Circaea* | 9 | 65 |
| Nymphaeales | Nymphaeaceae | *Nymphaea* | 36 | 184 |
| Piperales | Aristolochiaceae | *Asarum* | 93 | 392 |
| Poales | Cyperaceae | *Carex* | 79 | 106 |
| Proteales | Sabiaceae | *Meliosma* | 55 | 85 |
| Ranunculales | Berberidaceae | *Dysosma* | 7 | 21 |
| Ranunculales | Berberidaceae | *Epimedium* | 60 | 221 |
| Ranunculales | Papaveraceae | *Meconopsis* | 39 | 114 |
| Ranunculales | Ranunculaceae | *Actaea* | 21 | 112 |
| Rosales | Moraceae | *Morus* | 21 | 220 |
| Rosales | Rosaceae | *Malus* | 34 | 382 |
| Rosales | Rosaceae | *Potentilla* | 201 | 480 |
| Rosales | Ulmaceae | *Zelkova* | 6 | 81 |
| Rosales | Urticaceae | *Urtica* | 70 | 248 |
| Sapindales | Rutaceae | *Citrus* | 48 | 334 |
| Sapindales | Sapindaceae | *Acer* | 117 | 264 |
| Saxifragales | Crassulaceae | *Rhodiola* | 66 | 671 |
| Saxifragales | Paeoniaceae | *Paeonia* | 32 | 129 |
| Saxifragales | Saxifragaceae | *Astilbe* | 14 | 52 |
| Solanales | Convolvulaceae | *Calystegia* | 19 | 54 |
| Solanales | Convolvulaceae | *Cuscuta* | 49 | 135 |
| Solanales | Solanaceae | *Solanum* | 34 | 71 |
| Zingiberales | Zingiberaceae | *Amomum* | 73 | 251 |
| Sum | 55 | 80 | 3934 | 13741 |
